# Supplementary material for: Carriage prevalence and genomic epidemiology of Staphylococcus aureus among Native American children and adults in the Southwestern USA
Source: PubMed Central journal article supplement — Microb Genom. 2022 May 13;8(5):mgen000806. doi: 10.1099/mgen.0.000806 (PMC9465076; doi:10.1099/mgen.0.000806), 2022-05-13
Supplement: mgen-8-806-s001.pdf [file mgen-8-806-s001.pdf]

# Carriage prevalence and genomic epidemiology of *Staphylococcus aureus* among Native American children and adults in the southwestern USA

E. Cella, C. G. Sutcliffe, C. Tso, E. Paul, N. Ritchie, J. Colelay, E. Denny, L. R. Grant, R. C. Weatherholtz, L. L. Hammitt, T. Azarian

## Supplemental Material

**Supplemental Table 1.** Sensitivity of sampling different body sites for identifying *Staphylococcus aureus* carriage

**Supplemental Table 2.** Household risk factors for colonization with *Staphylococcus aureus* among Native American children in the Southwest United States.

**Supplemental Table 3.** Individual risk factors for colonization with *Staphylococcus aureus* among Native American adults in the Southwest United States.

**Supplemental Table 4.** Household risk factors for colonization with *Staphylococcus aureus* among Native American adults in the Southwest United States.

**Supplemental Table 1.** Sensitivity of sampling different body sites for identifying *Staphylococcus aureus* carriage

| Specimen type(s) | All participants                               |                              | Children (0-4 years)                           |                              | Adults (≥18 years)                             |                              |
|------------------|------------------------------------------------|------------------------------|------------------------------------------------|------------------------------|------------------------------------------------|------------------------------|
|                  | Number with SA isolated from any specimen type | Sensitivity <sup>a</sup> (%) | Number with SA isolated from any specimen type | Sensitivity <sup>a</sup> (%) | Number with SA isolated from any specimen type | Sensitivity <sup>a</sup> (%) |
| AN               | 54                                             | 80.6                         | 17                                             | 68.0                         | 37                                             | 56.9                         |
| NP               | 46                                             | 68.7                         | 19                                             | 76.0                         | 27                                             | 41.5                         |
| OP               | -                                              | -                            | -                                              | -                            | 34                                             | 52.3                         |
|                  |                                                |                              |                                                |                              |                                                |                              |
| AN and NP        | 67                                             | 100.0                        | 25                                             | 100.0                        | 42                                             | 64.6                         |
| AN and OP        | -                                              | -                            | -                                              | -                            | 60                                             | 92.3                         |
| NP and OP        | -                                              | -                            | -                                              | -                            | 53                                             | 81.5                         |
| AN, NP and OP    | -                                              | -                            | -                                              | -                            | 65                                             | 100.0                        |

AN: anterior nares; NP: nasopharynx; OP: oropharynx; SA: *Staphylococcus aureus*

<sup>a</sup> Sensitivity of each body site compared to all body sites combined: for all participants and children, body sites included AN and NP; for adults, body sites included AN, NP, and OP.

**Supplemental Table 2.** Household risk factors for colonization with *Staphylococcus aureus* among Native American children in the Southwest United States.

|                                                                                                                      |                 | <b>Total population<br/>(N=121)<br/>n (%)</b> | <b>Positive at any site<br/>(n=25)<br/>n (%)</b> | <b>Crude prevalence ratio (95% CI)</b> | <b>p-value<sup>a</sup></b> |  |
|----------------------------------------------------------------------------------------------------------------------|-----------------|-----------------------------------------------|--------------------------------------------------|----------------------------------------|----------------------------|--|
| Number of people in the household, n (%)                                                                             | 1-2             | 5 (4.1)                                       | 0                                                | Ref                                    |                            |  |
|                                                                                                                      | 3-4             | 37 (30.6)                                     | 7 (18.9)                                         |                                        |                            |  |
|                                                                                                                      | 5-6             | 53 (43.8)                                     | 12 (22.6)                                        | 1.36 (0.59, 3.15)                      | 0.47                       |  |
|                                                                                                                      | 7+              | 26 (21.5)                                     | 6 (23.1)                                         | 1.38 (0.52, 3.67)                      | 0.51                       |  |
| Other children in the household                                                                                      | No              | 63 (52.1)                                     | 15 (23.8)                                        | Ref                                    |                            |  |
|                                                                                                                      | Yes             | 58 (47.9)                                     | 10 (17.2)                                        | 0.72 (0.35, 1.48)                      | 0.38                       |  |
| Smoker in the household, n (%)                                                                                       | No              | 117 (97.5)                                    | 25 (21.4)                                        | Ref                                    |                            |  |
|                                                                                                                      | Yes             | 3 (2.6)                                       | 0                                                | -                                      | 1.00                       |  |
| Number of rooms in the house, n (%)                                                                                  | 1-2             | 22 (18.3)                                     | 6 (27.3)                                         | Ref                                    |                            |  |
|                                                                                                                      | 3-4             | 24 (20.0)                                     | 5 (20.8)                                         | 0.76 (0.27, 2.15)                      | 0.61                       |  |
|                                                                                                                      | 5-6             | 35 (29.2)                                     | 9 (25.7)                                         | 0.94 (0.39, 2.28)                      | 0.90                       |  |
|                                                                                                                      | 7+              | 39 (32.5)                                     | 5 (12.8)                                         | 0.47 (0.16, 1.36)                      | 0.17                       |  |
| Number of rooms for sleeping in the house                                                                            | 1-2             | 55 (45.8)                                     | 12 (21.8)                                        | Ref                                    |                            |  |
|                                                                                                                      | 3+              | 65 (54.2)                                     | 13 (20.0)                                        | 0.92 (0.46, 1.84)                      | 0.81                       |  |
| People per bedroom, n (%)                                                                                            | ≤ 2             | 67 (55.8)                                     | 11 (16.4)                                        | Ref                                    |                            |  |
|                                                                                                                      | >2              | 53 (44.2)                                     | 14 (26.4)                                        | 1.61 (0.80, 3.25)                      | 0.18                       |  |
| Presence of indoor piped water                                                                                       | No              | 22 (18.3)                                     | 2 (9.1)                                          | Ref                                    |                            |  |
|                                                                                                                      | Yes             | 98 (81.7)                                     | 23 (23.5)                                        | 2.58 (0.66, 10.15)                     | 0.17                       |  |
| Use of a wood-burning stove                                                                                          | No              | 116 (95.9)                                    | 25 (21.6)                                        | Ref                                    |                            |  |
|                                                                                                                      | Yes             | 5 (4.1)                                       | 0                                                | -                                      | 0.58                       |  |
| Presence of pet in the house                                                                                         | No              | 87 (71.9)                                     | 16 (18.4)                                        | Ref                                    |                            |  |
|                                                                                                                      | Yes             | 34 (28.1)                                     | 9 (26.5)                                         | 1.44 (0.70, 2.94)                      | 0.32                       |  |
| Presence of livestock                                                                                                | No              | 99 (81.8)                                     | 19 (19.2)                                        | Ref                                    |                            |  |
|                                                                                                                      | Yes             | 21 (17.4)                                     | 5 (23.8)                                         | 1.66 (0.79, 3.50)                      | 0.18                       |  |
| Self-reported history of skin infections or complications among household members (e.g. boils, spider bites, eczema) | No              | 102 (84.3)                                    | 19 (18.6)                                        | Ref                                    |                            |  |
|                                                                                                                      | Yes             | 19 (15.7)                                     | 6 (31.6)                                         | 1.70 (0.78, 3.68)                      | 0.18                       |  |
| Self-reported history of <i>S. aureus</i> infection among household members                                          | No              | 112 (93.3)                                    | 23 (20.5)                                        | Ref                                    |                            |  |
|                                                                                                                      | Yes             | 8 (6.7)                                       | 2 (25.0)                                         | 1.22 (0.35, 4.27)                      | 0.76                       |  |
| Household member with chronic illness requiring frequent healthcare                                                  | No              | 109 (90.8)                                    | 22 (20.2)                                        | Ref                                    |                            |  |
|                                                                                                                      | Yes             | 11 (9.2)                                      | 3 (27.3)                                         | 1.35 (0.48, 3.80)                      | 0.57                       |  |
| Behaviors of household members in the past 6 months                                                                  |                 |                                               |                                                  |                                        |                            |  |
|                                                                                                                      | Hospitalization | No                                            | 101 (83.5)                                       | 20 (19.8)                              | Ref                        |  |

|                                             |     |             |           |                    |      |
|---------------------------------------------|-----|-------------|-----------|--------------------|------|
|                                             | Yes | 20 (16.5)   | 5 (25.0)  | 1.27 (0.54, 2.97)  | 0.59 |
| Surgery                                     | No  | 109 (90.1)  | 24 (22.0) | Ref                |      |
|                                             | Yes | 12 (9.9)    | 1 (8.3)   | 0.38 (0.06, 2.55)  | 0.32 |
| Long-term care residence                    | No  | 121 (100.0) | 25 (20.7) | Ref                |      |
|                                             | Yes | 0           | 0         | -                  | -    |
| Shared a towel                              | No  | 92 (76.0)   | 19 (20.7) | Ref                |      |
|                                             | Yes | 29 (24.0)   | 6 (20.7)  | 1.00 (0.44, 2.27)  | 1.00 |
| Shared a bed                                | No  | 68 (56.2)   | 13 (19.1) | Ref                |      |
|                                             | Yes | 53 (43.8)   | 12 (22.6) | 1.18 (0.59, 2.38)  | 0.63 |
| Worn clothes more than once without washing | No  | 102 (84.3)  | 20 (19.6) | Ref                |      |
|                                             | Yes | 19 (15.7)   | 5 (26.3)  | 1.34 (0.57, 3.14)  | 0.50 |
| Shared clothes                              | No  | 119 (98.4)  | 24 (20.2) | Ref                |      |
|                                             | Yes | 2 (1.7)     | 1 (50.0)  | 2.48 (0.59, 10.37) | 0.21 |
| Used a gym                                  | No  | 113 (93.4)  | 24 (21.2) | Ref                |      |
|                                             | Yes | 8 (6.6)     | 1 (12.5)  | 0.59 (0.09, 3.81)  | 0.58 |
| Used a locker room                          | No  | 115 (95.0)  | 25 (21.7) | Ref                |      |
|                                             | Yes | 6 (5.0)     | 0         | -                  | 0.34 |
| Went to a sweat lodge                       | No  | 114 (94.2)  | 24 (21.1) | Ref                |      |
|                                             | Yes | 7 (5.8)     | 1 (14.3)  | 0.68 (0.11, 4.31)  | 0.68 |
| Child in household attended daycare         | No  | 121 (100.0) | 25 (20.7) | Ref                |      |
|                                             | Yes | 0           | 0         | -                  | -    |

CI: confidence interval; Ref: reference value;

<sup>a</sup> P-values represent the difference in prevalence of colonization between those with and without the characteristic of interest. P-values are reported from log-binomial regression or from Fisher's Exact Test where regression was not possible. P-values <0.05 are presented in bold.

**Supplemental Table 3.** Individual risk factors for colonization with *Staphylococcus aureus* among Native American adults in the Southwest United States.

|                                                                                              |                    | Total population<br>(N=167)<br>n (%) | Positive at any site<br>(n=66)<br>n (%) | Crude prevalence ratio (95% CI) | p-value <sup>a</sup> | Age-adjusted prevalence ratio (95% CI) | p-value <sup>a</sup> |
|----------------------------------------------------------------------------------------------|--------------------|--------------------------------------|-----------------------------------------|---------------------------------|----------------------|----------------------------------------|----------------------|
| Sex                                                                                          | Male               | 37 (22.2)                            | 14 (37.8)                               | 0.95 (0.60, 1.50)               | 0.81                 | 0.97 (0.62, 1.51)                      | 0.89                 |
|                                                                                              | Female             | 130 (77.8)                           | 52 (40.0)                               | Ref                             |                      | Ref                                    |                      |
| Type of living facility                                                                      | Residence          | 164 (98.2)                           | 66 (40.2)                               | Ref                             |                      | Ref                                    |                      |
|                                                                                              | Currently homeless | 3 (1.8)                              | 0                                       | -                               | 0.28                 | -                                      | -                    |
| Times likely to bathe or shower in a typical week                                            | 1-2                | 29 (17.8)                            | 12 (41.4)                               | Ref                             |                      | Ref                                    |                      |
|                                                                                              | 3-4                | 46 (28.2)                            | 18 (38.1)                               | 0.95 (0.54, 1.66)               | 0.85                 | 1.04 (0.61, 1.77)                      | 0.88                 |
|                                                                                              | 5-6                | 23 (14.1)                            | 7 (30.4)                                | 0.74 (0.35, 1.56)               | 0.42                 | 0.62 (0.30, 1.31)                      | 0.21                 |
|                                                                                              | 7+                 | 65 (39.9)                            | 28 (43.1)                               | 1.04 (0.62, 1.74)               | 0.88                 | 0.94 (0.57, 1.54)                      | 0.80                 |
| Current tobacco smoker                                                                       | No                 | 148 (88.6)                           | 54 (36.5)                               | Ref                             |                      | Ref                                    |                      |
|                                                                                              | Yes                | <b>19 (11.4)</b>                     | <b>12 (63.2)</b>                        | <b>1.73 (1.16, 2.59)</b>        | <b>0.008</b>         | 1.43 (0.94, 2.16)                      | 0.09                 |
| Current chewing tobacco user                                                                 | No                 | 154 (92.2)                           | 61 (39.6)                               | Ref                             |                      | Ref                                    |                      |
|                                                                                              | Yes                | 13 (7.8)                             | 5 (38.5)                                | 0.97 (0.48, 1.98)               | 0.94                 | 0.83 (0.41, 1.70)                      | 0.62                 |
| Self-reported history of skin infections or complications (e.g. boils, spider bites, eczema) | No                 | 136 (81.4)                           | 52 (38.2)                               | Ref                             |                      | Ref                                    |                      |
|                                                                                              | Yes                | 31 (18.6)                            | 14 (45.2)                               | 1.18 (0.76, 1.84)               | 0.46                 | 1.14 (0.73, 1.79)                      | 0.56                 |
| Documented SA infection in the past 5 years                                                  | No                 | 162 (97.0)                           | 64 (39.5)                               | Ref                             |                      | Ref                                    |                      |
|                                                                                              | Yes                | 5 (3.0)                              | 2 (40.0)                                | 1.01 (0.34, 3.01)               | 0.98                 | 0.96 (0.33, 2.76)                      | 0.94                 |
| Antibiotic use in the past 14 days                                                           | No                 | 144 (89.4)                           | 61 (42.4)                               | Ref                             |                      | Ref                                    |                      |
|                                                                                              | Yes                | 17 (10.6)                            | 2 (11.8)                                | 0.28 (0.07, 1.04)               | 0.06                 | 0.31 (0.08, 1.17)                      | 0.08                 |
| Any underlying health condition                                                              | No                 | 61 (36.5)                            | 24 (39.3)                               | Ref                             |                      | Ref                                    |                      |
|                                                                                              | Yes                | 106 (63.5)                           | 42 (39.6)                               | 1.01 (0.68, 1.49)               | 0.97                 | 1.12 (0.76, 1.64)                      | 0.57                 |
| Diabetes                                                                                     | No                 | 114 (68.3)                           | 47 (41.2)                               | Ref                             |                      | Ref                                    |                      |
|                                                                                              | Yes                | 53 (31.7)                            | 19 (35.9)                               | 0.87 (0.57, 1.33)               | 0.52                 | 1.32 (0.84, 2.07)                      | 0.22                 |
| Obesity                                                                                      | No                 | 93 (55.7)                            | 33 (35.5)                               | Ref                             |                      | Ref                                    |                      |
|                                                                                              | Yes                | 74 (44.3)                            | 33 (44.6)                               | 1.26 (0.86, 1.83)               | 0.23                 | 1.20 (0.77, 1.62)                      | 0.55                 |
| Behaviors in the past 6 months                                                               |                    |                                      |                                         |                                 |                      |                                        |                      |
| Hospitalization                                                                              | No                 | 145 (86.8)                           | 56 (38.6)                               | Ref                             |                      | Ref                                    |                      |
|                                                                                              | Yes                | 22 (13.2)                            | 10 (45.5)                               | 1.18 (0.71, 1.94)               | 0.52                 | 1.35 (0.84, 2.17)                      | 0.21                 |
| Surgery                                                                                      | No                 | 148 (88.6)                           | 55 (37.2)                               | Ref                             |                      | Ref                                    |                      |
|                                                                                              | Yes                | <b>19 (11.4)</b>                     | <b>11 (57.9)</b>                        | <b>1.56 (1.01, 2.41)</b>        | <b>0.05</b>          | <b>1.91 (1.23, 2.97)</b>               | <b>0.004</b>         |
| Long-term care residence                                                                     | No                 | 163 (97.6)                           | 65 (39.9)                               | Ref                             |                      | Ref                                    |                      |
|                                                                                              | Yes                | 4 (2.4)                              | 1 (25.0)                                | 0.63 (0.11, 3.46)               | 0.59                 | 0.58 (0.11, 3.16)                      | 0.53                 |
| Shared a towel                                                                               | No                 | 142 (85.0)                           | 52 (36.6)                               | Ref                             |                      | Ref                                    |                      |
|                                                                                              | Yes                | <b>25 (15.0)</b>                     | <b>14 (56.0)</b>                        | <b>1.53 (1.02, 2.30)</b>        | <b>0.04</b>          | 1.32 (0.88, 1.99)                      | 0.18                 |
| Shared a bed                                                                                 | No                 | 108 (64.7)                           | 39 (36.1)                               | Ref                             |                      | Ref                                    |                      |
|                                                                                              | Yes                | 59 (35.3)                            | 27 (45.8)                               | 1.27 (0.87, 1.84)               | 0.21                 | 1.13 (0.78, 1.65)                      | 0.51                 |

|                                                      |     |            |           |                   |      |                   |      |
|------------------------------------------------------|-----|------------|-----------|-------------------|------|-------------------|------|
| Worn clothes more than once without washing          | No  | 116 (69.5) | 43 (37.1) | Ref               |      | Ref               |      |
|                                                      | Yes | 51 (30.5)  | 23 (45.1) | 1.22 (0.83, 1.79) | 0.32 | 1.17 (0.81, 1.71) | 0.40 |
| Shared clothes                                       | No  | 162 (97.0) | 65 (40.1) | Ref               |      | Ref               |      |
|                                                      | Yes | 5 (3.0)    | 1 (20.0)  | 0.50 (0.09, 2.89) | 0.44 | 0.44 (0.08, 2.56) | 0.36 |
| Gym use                                              | No  | 147 (88.0) | 56 (38.1) | Ref               |      | Ref               |      |
|                                                      | Yes | 20 (12.0)  | 10 (50.0) | 1.31 (0.81, 2.13) | 0.27 | 1.14 (0.68, 1.89) | 0.62 |
| Used a locker room                                   | No  | 159 (95.2) | 61 (38.4) | Ref               |      | Ref               |      |
|                                                      | Yes | 8 (4.8)    | 5 (62.5)  | 1.63 (0.92, 2.89) | 0.09 | 1.33 (0.75, 2.39) | 0.33 |
| Went to a sweat lodge                                | No  | 164 (98.2) | 65 (39.6) | Ref               |      | Ref               |      |
|                                                      | Yes | 3 (1.8)    | 1 (33.3)  | 0.84 (0.17, 4.21) | 0.83 | 0.85 (0.18, 4.09) | 0.84 |
| Participated in organized team sports or activities  | No  | 153 (92.7) | 60 (39.2) | Ref               |      | Ref               |      |
|                                                      | Yes | 12 (7.3)   | 5 (41.7)  | 1.06 (0.53, 2.14) | 0.86 | 0.86 (0.42, 1.75) | 0.67 |
| Received any artistic (body-art) or cosmetic tattoos | No  | 156 (94.6) | 60 (38.5) | Ref               |      | Ref               |      |
|                                                      | Yes | 9 (5.4)    | 5 (55.6)  | 1.44 (0.78, 2.68) | 0.24 | 1.14 (0.59, 2.20) | 0.70 |
| Received any body or facial piercings                | No  | 160 (97.0) | 62 (38.8) | Ref               |      | Ref               |      |
|                                                      | Yes | 5 (3.0)    | 3 (60.0)  | 1.55 (0.74, 3.25) | 0.25 | 1.23 (0.57, 2.66) | 0.61 |
| Used drugs for non-medical purposes                  | No  | 158 (95.8) | 61 (38.6) | Ref               |      | Ref               |      |
|                                                      | Yes | 7 (4.2)    | 4 (57.1)  | 1.48 (0.76, 2.90) | 0.25 | 1.24 (0.63, 2.42) | 0.54 |

CI: confidence interval; Ref: reference value;

<sup>a</sup> P-values represent the difference in prevalence of colonization between those with and without the characteristic of interest. P-values are reported from log-binomial regression. For the univariable analysis, if log-binomial regression was not possible, p-values from Fisher's Exact Test are reported. P-values <0.05 are presented in bold.

**Supplemental Table 4.** Household risk factors for colonization with *Staphylococcus aureus* among Native American adults in the Southwest United States.

|                                                                                                                      |     | <b>Total population<br/>(N=167)<br/>n (%)</b> | <b>Positive at any site<br/>(n=66)<br/>n (%)</b> | <b>Crude prevalence ratio<br/>(95% CI)</b> | <b>p-value<sup>a</sup></b> | <b>Age-adjusted prevalence ratio<br/>(95% CI)</b> | <b>p-value<sup>a</sup></b> |
|----------------------------------------------------------------------------------------------------------------------|-----|-----------------------------------------------|--------------------------------------------------|--------------------------------------------|----------------------------|---------------------------------------------------|----------------------------|
| Number of people in the household, n (%)                                                                             | 1-2 | 71 (42.5)                                     | 24 (33.8)                                        | Ref                                        |                            | Ref                                               |                            |
|                                                                                                                      | 3-4 | 52 (31.1)                                     | 25 (48.1)                                        | 1.42 (0.92, 2.19)                          | 0.11                       | 1.23 (0.80, 1.89)                                 | 0.35                       |
|                                                                                                                      | 5-6 | 33 (19.8)                                     | 14 (42.4)                                        | 1.26 (0.75, 2.10)                          | 0.39                       | 1.11 (0.67, 1.84)                                 | 0.68                       |
|                                                                                                                      | 7+  | 11 (6.6)                                      | 3 (27.3)                                         | 0.81 (0.29, 2.23)                          | 0.68                       | 0.69 (0.25, 1.89)                                 | 0.47                       |
| Any children in the household                                                                                        | No  | 124 (74.3)                                    | 49 (39.5)                                        | Ref                                        |                            | Ref                                               |                            |
|                                                                                                                      | Yes | 43 (25.8)                                     | 17 (39.5)                                        | 1.00 (0.65, 1.54)                          | 1.00                       | 0.80 (0.51, 1.24)                                 | 0.32                       |
| Smoker in the household, n (%)                                                                                       | No  | 156 (95.1)                                    | 60 (38.5)                                        | Ref                                        |                            | Ref                                               |                            |
|                                                                                                                      | Yes | 8 (4.9)                                       | 5 (62.5)                                         | 1.63 (0.92, 2.88)                          | 0.10                       | 1.37 (0.77, 2.43)                                 | 0.29                       |
| Number of rooms in the house, n (%)                                                                                  | 1-2 | 24 (14.4)                                     | 9 (37.5)                                         | Ref                                        |                            | Ref                                               |                            |
|                                                                                                                      | 3-4 | 45 (27.0)                                     | 20 (44.4)                                        | 1.19 (0.64, 2.18)                          | 0.59                       | 1.31 (0.72, 2.39)                                 | 0.37                       |
|                                                                                                                      | 5-6 | 58 (34.7)                                     | 20 (34.5)                                        | 0.92 (0.49, 1.72)                          | 0.79                       | 1.12 (0.60, 2.08)                                 | 0.72                       |
|                                                                                                                      | 7+  | 40 (24.0)                                     | 17 (42.5)                                        | 1.13 (0.60, 2.13)                          | 0.70                       | 1.24 (0.67, 2.32)                                 | 0.49                       |
| Number of rooms for sleeping in the house                                                                            | 1-2 | 91 (54.5)                                     | 40 (44.0)                                        | Ref                                        |                            | Ref                                               |                            |
|                                                                                                                      | 3+  | 76 (45.5)                                     | 26 (34.2)                                        | 0.78 (0.53, 1.15)                          | 0.21                       | 0.89 (0.60, 1.32)                                 | 0.56                       |
| People per bedroom, n (%)                                                                                            | ≤ 2 | 143 (85.6)                                    | 58 (40.6)                                        | Ref                                        |                            | Ref                                               |                            |
|                                                                                                                      | >2  | 24 (14.4)                                     | 8 (33.3)                                         | 0.82 (0.45, 1.50)                          | 0.52                       | 0.69 (0.38, 1.24)                                 | 0.21                       |
| Presence of indoor piped water                                                                                       | No  | 41 (24.6)                                     | 17 (41.5)                                        | Ref                                        |                            | Ref                                               |                            |
|                                                                                                                      | Yes | 126 (75.5)                                    | 49 (38.9)                                        | 0.94 (0.61, 1.43)                          | 0.77                       | 1.03 (0.68, 1.56)                                 | 0.88                       |
| Use of a wood-burning stove                                                                                          | No  | 145 (86.8)                                    | 54 (37.2)                                        | Ref                                        |                            | Ref                                               |                            |
|                                                                                                                      | Yes | 22 (13.2)                                     | 12 (54.6)                                        | 1.46 (0.95, 2.27)                          | 0.09                       | 1.40 (0.89, 2.18)                                 | 0.14                       |
| Presence of pet in the house                                                                                         | No  | 113 (68.9)                                    | 44 (38.9)                                        | Ref                                        |                            | Ref                                               |                            |
|                                                                                                                      | Yes | 51 (31.1)                                     | 22 (43.1)                                        | 1.11 (0.75, 1.64)                          | 0.61                       | 1.05 (0.71, 1.57)                                 | 0.80                       |
| Presence of livestock                                                                                                | No  | 124 (75.6)                                    | 50 (40.3)                                        | Ref                                        |                            | Ref                                               |                            |
|                                                                                                                      | Yes | 38 (23.2)                                     | 14 (36.8)                                        | 1.09 (0.72, 1.65)                          | 0.68                       | 1.27 (0.86, 1.89)                                 | 0.24                       |
| Self-reported history of skin infections or complications among household members (e.g. boils, spider bites, eczema) | No  | 151 (90.4)                                    | 59 (39.1)                                        | Ref                                        |                            | Ref                                               |                            |
|                                                                                                                      | Yes | 16 (9.6)                                      | 7 (43.8)                                         | 1.12 (0.62, 2.02)                          | 0.71                       | 1.25 (0.71, 2.23)                                 | 0.44                       |
| Self-reported history of <i>S. aureus</i> infection among household members                                          | No  | 155 (96.9)                                    | 58 (37.4)                                        | Ref                                        |                            | Ref                                               |                            |
|                                                                                                                      | Yes | <b>5 (3.1)</b>                                | <b>4 (80.0)</b>                                  | <b>2.14 (1.32, 3.57)</b>                   | <b>0.002</b>               | <b>1.87 (1.08, 3.22)</b>                          | <b>0.02</b>                |
| Household member with chronic illness requiring frequent healthcare                                                  | No  | 122 (73.5)                                    | 47 (38.5)                                        | Ref                                        |                            | Ref                                               |                            |
|                                                                                                                      | Yes | 44 (26.5)                                     | 19 (43.2)                                        | 1.12 (0.75, 1.68)                          | 0.58                       | 1.24 (0.84, 1.83)                                 | 0.27                       |
| Behaviors of household members in the past 6 months                                                                  |     |                                               |                                                  |                                            |                            |                                                   |                            |
| Hospitalization                                                                                                      | No  | 156 (93.4)                                    | 60 (38.5)                                        | Ref                                        |                            | Ref                                               |                            |
|                                                                                                                      | Yes | 11 (6.6)                                      | 6 (54.6)                                         | 1.42 (0.80, 2.52)                          | 0.23                       | 1.34 (0.77, 2.31)                                 | 0.30                       |
| Surgery                                                                                                              | No  | 163 (97.6)                                    | 65 (39.9)                                        | Ref                                        |                            | Ref                                               |                            |
|                                                                                                                      | Yes | 4 (2.4)                                       | 1 (25.0)                                         | 0.63 (0.11, 3.46)                          | 0.59                       | 0.72 (0.14, 3.83)                                 | 0.70                       |

|                                             |     |                  |                  |                          |                   |                          |              |
|---------------------------------------------|-----|------------------|------------------|--------------------------|-------------------|--------------------------|--------------|
| Long-term care residence                    | No  | 166 (99.4)       | 65 (39.2)        | Ref                      |                   | Ref                      |              |
|                                             | Yes | 1 (0.6)          | 1 (100.0)        | -                        | 0.40              | -                        | -            |
| Shared a towel                              | No  | 138 (82.6)       | 52 (37.7)        | Ref                      |                   | Ref                      |              |
|                                             | Yes | 29 (17.4)        | 14 (48.3)        | 1.28 (0.83, 1.98)        | 0.26              | 1.28 (0.85, 1.93)        | 0.24         |
| Shared a bed                                | No  | 114 (68.3)       | 39 (34.2)        | Ref                      |                   | Ref                      |              |
|                                             | Yes | <b>53 (31.7)</b> | <b>27 (50.9)</b> | <b>1.49 (1.03, 2.15)</b> | <b>0.03</b>       | 1.37 (0.95, 1.98)        | 0.09         |
| Worn clothes more than once without washing | No  | 142 (85.0)       | 57 (40.1)        | Ref                      |                   | Ref                      |              |
|                                             | Yes | 25 (15.0)        | 9 (36.0)         | 0.90 (0.51, 1.57)        | 0.70              | 0.86 (0.50, 1.48)        | 0.59         |
| Shared clothes                              | No  | 163 (97.6)       | 64 (39.3)        | Ref                      |                   | Ref                      |              |
|                                             | Yes | 4 (2.4)          | 2 (50.0)         | 1.27 (0.47, 3.46)        | 0.64              | 1.25 (0.49, 3.23)        | 0.64         |
| Used a gym                                  | No  | 157 (94.0)       | 58 (36.9)        | Ref                      |                   | Ref                      |              |
|                                             | Yes | <b>10 (6.0)</b>  | <b>8 (80.0)</b>  | <b>2.17 (1.49, 3.14)</b> | <b>&lt;0.0001</b> | <b>1.80 (1.23, 2.64)</b> | <b>0.003</b> |
| Used a locker room                          | No  | 158 (94.6)       | 59 (37.3)        | Ref                      |                   | Ref                      |              |
|                                             | Yes | <b>9 (5.4)</b>   | <b>7 (77.8)</b>  | <b>2.09 (1.39, 3.12)</b> | <b>0.0004</b>     | <b>1.98 (1.29, 3.04)</b> | <b>0.002</b> |
| Went to a sweat lodge                       | No  | 164 (98.2)       | 65 (39.6)        | Ref                      |                   | Ref                      |              |
|                                             | Yes | 3 (1.8)          | 1 (33.3)         | 0.84 (0.17, 4.21)        | 0.83              | 0.69 (0.14, 3.47)        | 0.66         |
| Child in household attended daycare         | No  | 163 (97.6)       | 66 (40.5)        | Ref                      |                   | Ref                      |              |
|                                             | Yes | 4 (2.4)          | 0                | -                        | 0.15              | -                        | -            |

CI: confidence interval; Ref: reference value;

<sup>a</sup> P-values represent the difference in prevalence of colonization between those with and without the characteristic of interest. P-values are reported from log-binomial regression. For the univariable analysis, if log-binomial regression was not possible, p-values from Fisher's Exact Test are reported. P-values <0.05 are presented in bold.
